# Supplementary material for: Incidence and Complication Rates for Total Hip Arthroplasty in Rheumatoid Arthritis: A Systematic Review and Meta-Analysis Across Four Decades
Source: PubMed Central journal article supplement — Rheumatol Ther. 2020 Sep 30;7(4):685–702. doi: 10.1007/s40744-020-00238-z (PMC7695804; doi:10.1007/s40744-020-00238-z), 2020-09-30
Supplement: 40744_2020_238_MOESM1_ESM.pdf [file 40744_2020_238_MOESM1_ESM.pdf]

## Table of Contents

|                                                                                                                                                                                  |    |
|----------------------------------------------------------------------------------------------------------------------------------------------------------------------------------|----|
| Table S1: Distribution of included studies by continent, country and decade .....                                                                                                | 4  |
| Figure S1: Detailed search strategy used for systematic review of THA in RA patients .....                                                                                       | 4  |
| Supplementary figures related to incidence of THA in RA patients .....                                                                                                           | 6  |
| Figure S2a: Incidence of THA in RA patients from 2000-2009 .....                                                                                                                 | 6  |
| Figure S2b: Incidence of THA in RA patients from 2010-2019 .....                                                                                                                 | 6  |
| Figure S3a: Incidence of THA in European RA patients .....                                                                                                                       | 7  |
| Figure S3b: Incidence of THA in North American RA patients .....                                                                                                                 | 7  |
| Figure S4a: Incidence of THA in RA population where OA diagnosis was specifically excluded .....                                                                                 | 7  |
| Figure S4b: Incidence of THA in RA population where OA diagnosis was not specifically excluded....                                                                               | 8  |
| Supplementary figures related to post-operative complications for RA patients receiving THA.....                                                                                 | 9  |
| Overall Complication rate .....                                                                                                                                                  | 9  |
| Figure S5a: Combined rate of post-operative periprosthetic fracture, revision, dislocation,<br>infection, aseptic loosening for RA patients receiving THA from 1980-2019 .....   | 9  |
| Figure S5b: Combined rate of post-operative periprosthetic fracture, revision, dislocation,<br>infection, aseptic loosening for RA patients receiving THA from 1980-1989 .....   | 10 |
| Figure S5c: Combined rate of post-operative periprosthetic fracture, revision, dislocation,<br>infection, aseptic loosening for RA patients receiving THA from 1990-1999 .....   | 10 |
| Figure S5d: Combined rate of post-operative periprosthetic fracture, revision, dislocation,<br>infection, aseptic loosening for RA patients receiving THA from 2000-2009 .....   | 11 |
| Figure S5e: Combined rate of post-operative periprosthetic fracture, revision, dislocation,<br>infection, aseptic loosening for RA patients receiving THA from 2010-2019 .....   | 11 |
| Figure S5f: Combined rate of post-operative periprosthetic fracture, revision, dislocation,<br>infection, aseptic loosening for RA patients receiving THA in North America ..... | 12 |
| Figure S5g: Combined rate of post-operative periprosthetic fracture, revision, dislocation,<br>infection, aseptic loosening for RA patients receiving THA in Europe.....         | 12 |
| Figure S5h: Combined rate of post-operative periprosthetic fracture, revision, dislocation,<br>infection, aseptic loosening for RA patients receiving THA in Asia .....          | 13 |
| Revision rate .....                                                                                                                                                              | 13 |
| Figure S6a: Rate revision for RA patients receiving THA from 1980-2019 .....                                                                                                     | 13 |
| Figure S6b: Rate revision for RA patients receiving THA from 1980-1989 .....                                                                                                     | 14 |
| Figure S6c: Rate revision for RA patients receiving THA from 1990-1999.....                                                                                                      | 14 |
| Figure S6d: Rate revision for RA patients receiving THA from 2000-2009 .....                                                                                                     | 14 |
| Figure S6e: Rate revision for RA patients receiving THA from 2010-2019 .....                                                                                                     | 15 |

|                                                                                                             |    |
|-------------------------------------------------------------------------------------------------------------|----|
| Periprosthetic Fracture .....                                                                               | 15 |
| Figure S7a: Post-operative periprosthetic fracture rate in RA patients receiving THA from 1990-2019 .....   | 15 |
| Figure S7b: Post-operative periprosthetic fracture rate in RA patients receiving THA from 2000-2009 .....   | 15 |
| Figure S7c: Post-operative periprosthetic fracture rate in RA patients receiving THA from 2010-2019 .....   | 16 |
| Infection .....                                                                                             | 16 |
| Figure S8a: Post-operative infection rate for RA patients receiving THA from 1980-2019 .....                | 16 |
| Figure S8b: Post-operative infection rate for RA patients receiving THA from 1990-1999 .....                | 17 |
| Figure S8c: Post-operative infection rate for RA patients receiving THA from 2000-2009 .....                | 17 |
| Figure S8d: Post-operative infection rate for RA patients receiving THA from 2010-2019 .....                | 17 |
| Aseptic Loosening .....                                                                                     | 18 |
| Figure S9a: Post-operative aseptic loosening rate for RA patients receiving THA from 1980-2019 .....        | 18 |
| Figure S9b: Post-operative aseptic loosening rate for RA patients receiving THA from 1990-1999 .....        | 18 |
| Figure S9c: Post-operative aseptic loosening rate for RA patients receiving THA from 2000-2009 .....        | 19 |
| Figure S9d: Post-operative aseptic loosening rate for RA patients receiving THA from 2010-2019 .....        | 19 |
| Dislocation .....                                                                                           | 20 |
| Figure S10a: Post-operative dislocation rate in RA patient receiving THA from 1990-2019 .....               | 20 |
| Figure S10b: Post-operative dislocation rate in RA patient receiving THA from 1990-1999 .....               | 20 |
| Figure S10c: Post-operative dislocation rate in RA patient receiving THA from 2000-2009 .....               | 20 |
| Figure S10d: Post-operative dislocation rate in RA patient receiving THA from 2010-2019 .....               | 21 |
| VTE .....                                                                                                   | 21 |
| Figure S11a: Rate of post-operative VTE in RA patients receiving THA 1980-2019 .....                        | 21 |
| Figure S11b: Rate of post-operative VTE in RA patients receiving THA 2010-2019 .....                        | 21 |
| Mortality .....                                                                                             | 22 |
| Figure S12a: Post-operative 90-day mortality rate for RA patients receiving THA between 1980 and 2019 ..... | 22 |
| Figure S12b: Mortality rate for studies from 2010-2019 with mean follow up time less than 90 days .....     | 22 |



Table S1: Distribution of included studies by continent, country and decade

| Continent                | Incidence          | Complication   |
|--------------------------|--------------------|----------------|
| Africa                   |                    | 1              |
| North America            | 2                  | 10             |
| Europe                   | 10                 | 10             |
| Asia                     | 1                  | 5              |
| Country                  | Incidence          | Complications  |
| Japan                    | 1                  | 5              |
| Finland                  | 1                  | 4              |
| Netherlands              | 0                  | 3              |
| England                  | 4 <sup>1,2,3</sup> | 4 <sup>4</sup> |
| Sweden                   | 3                  | 3              |
| Denmark                  | 1                  | 0              |
| Wales                    | 3 <sup>1,2,3</sup> | 3 <sup>4</sup> |
| Greece                   | 1                  | 0              |
| United States of America | 2                  | 8              |
| Scotland                 | 2 <sup>2,3</sup>   | 3 <sup>4</sup> |
| Northern Ireland         | 1 <sup>3</sup>     | 3 <sup>4</sup> |
| South Africa             | 0                  | 1              |
| Norway                   | 0                  | 2              |
| Hungary                  | 0                  | 1              |
| Germany                  | 0                  | 2              |
| Canada                   | 0                  | 2              |
| Austria                  | 0                  | 1              |
| Decade                   | Incidence          | Complications  |
| 1980-1989                | 0                  | 2              |
| 1990-1999                | 1                  | 12             |
| 2000-2009                | 3                  | 12             |
| 2010-2019                | 9                  | 10             |

<sup>1</sup>: one paper from England and Wales

<sup>2</sup>: one paper from Scotland, England, and Wales

<sup>3</sup> and <sup>4</sup> each represent one paper from Scotland, England, Wales, and Northern Ireland

Figure S1: Detailed search strategy used for systematic review of THA in RA patients

|            |     |                                                     |          |              |     |                 |
|------------|-----|-----------------------------------------------------|----------|--------------|-----|-----------------|
| RA         |     | Total hip replacement                               |          | Rates        |     | Adult           |
| Rheumatoid | AND | Total hip replacements                              | AND      | Rate(s)      | AND | Adult           |
| Arthritis  |     | OR                                                  |          | OR           |     | OR              |
| OR         |     | Total hip arthroplasty/<br>total hip arthroplasties |          | Incidence    |     | Aged            |
| Rheumatic  |     | OR                                                  |          | Prevalence   |     | OR              |
| disease    |     | Total hip<br>implantation(s)                        |          | OR           |     | Middle-<br>aged |
|            |     | OR                                                  | Trend(s) |              |     |                 |
|            |     | Hip prosthesis<br>implantation                      |          | Epidemiology |     |                 |

## Limit

- Human(s)
- English
- 1980-2019

## Detailed MEDLINE search

1. Arthritis, rheumatoid/
2. Rheumatic, diseases/
3. Rheumatoid arthritis.mp
4. Rheumatic disease\*.mp
5. 1 or 2 or 3 or 4
6. Arthroplasty, replacement, hip/
7. Hip prosthesis/
8. Total hip prosthesis.mp
9. arthroplast\*.mp
10. Total hip replacement\*.mp
11. Hip prosthesis implantation\*.mp
12. 6 or 7 or 8 or 9 or 10 or 11 or 12
13. Incidence/
14. Epidemiology/
15. Prevalence/
16. Prevalence.mp
17. Incidence.mp
18. Rate\*.mp
19. Trend\*.mp
20. Epidemiology.mp
21. 13 or 14 or 15 or 16 or 17 or 18 or 19 or 20
22. Adult/
23. Aged/
24. Middle-aged/
25. Adult.mp
26. Aged.mp
27. Middle-aged.mp
28. 22 or 23 or 24 or 25 or 26 or 27 or 28
29. 28 and 21 and 12 and 5
30. Limit 29 to English language and humans and yr=" 1980-2019"

## Databases searched and results

- Scopus: 772
- MEDLINE: 307
- EMBASE: 651
- Cochrane: 68

Supplementary figures related to incidence of THA in RA patients

Figure S2a: Incidence of THA in RA patients from 2000-2009

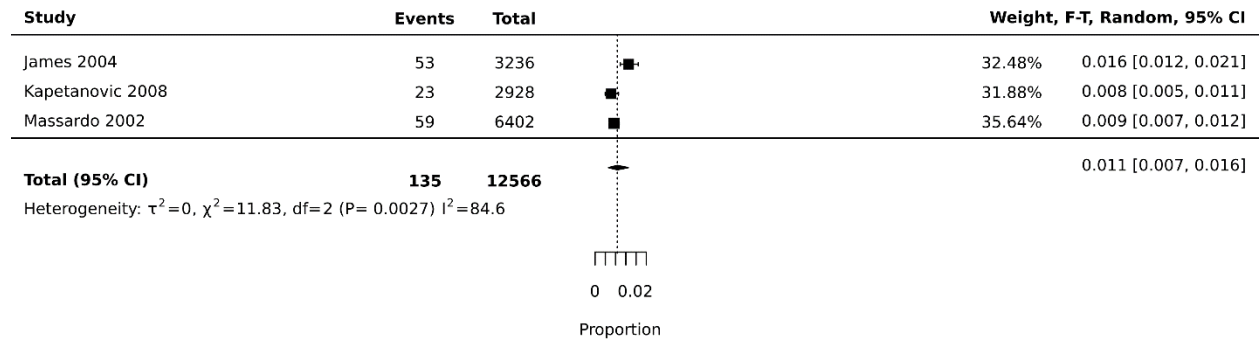

Figure S2b: Incidence of THA in RA patients from 2010-2019

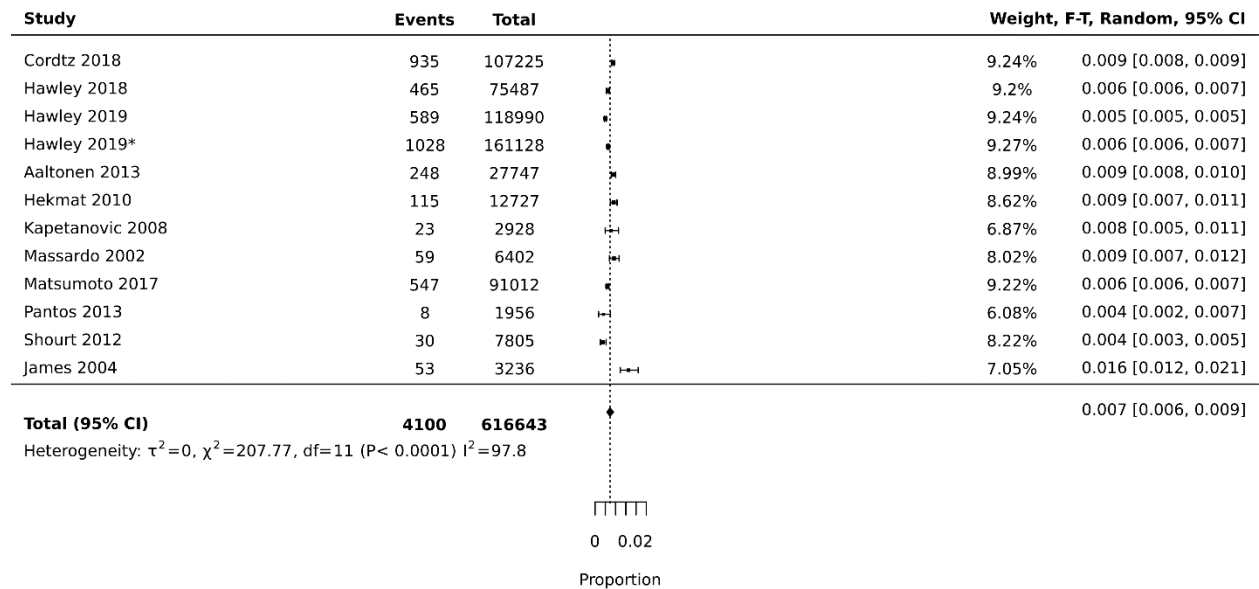

Figure S3a: Incidence of THA in European RA patients

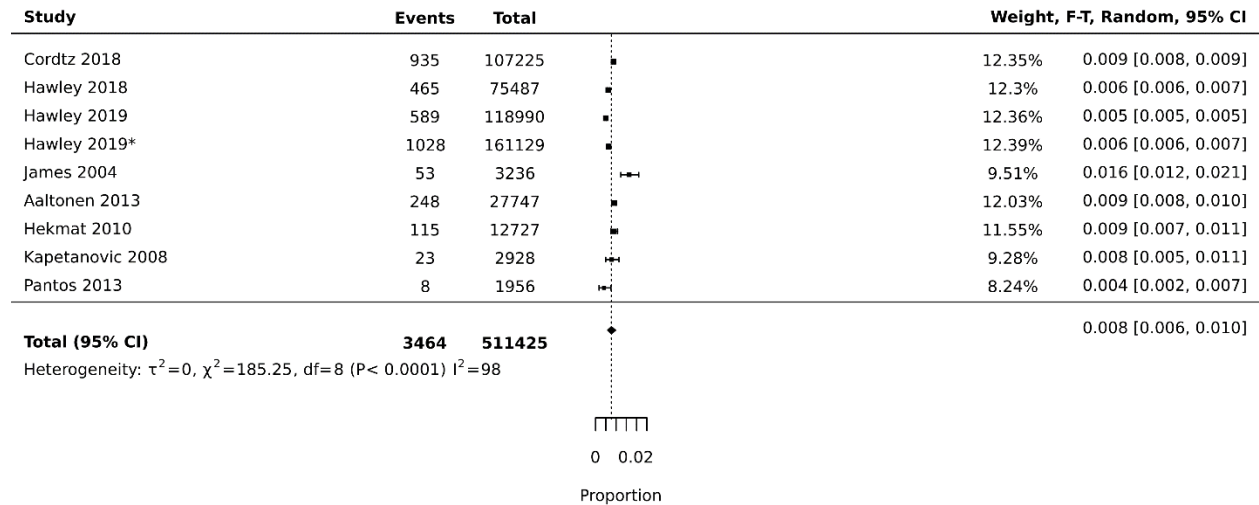

One outlier study was removed from these results (1)

Figure S3b: Incidence of THA in North American RA patients

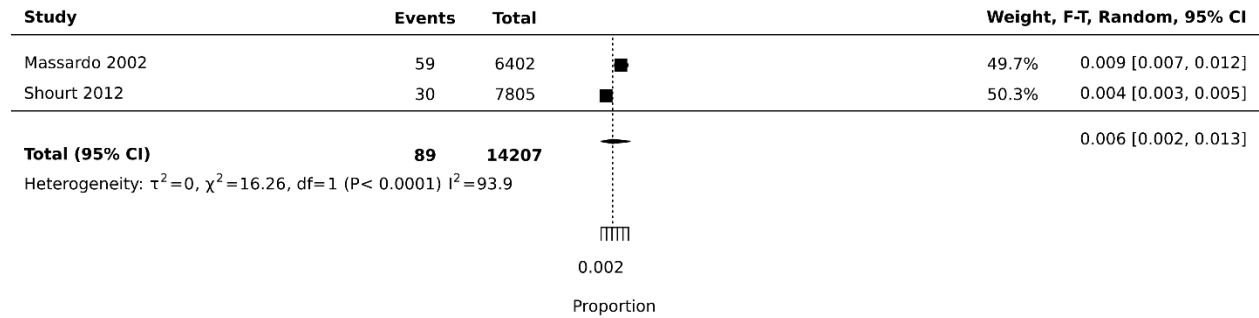

Figure S4a: Incidence of THA in RA population where OA diagnosis was specifically excluded

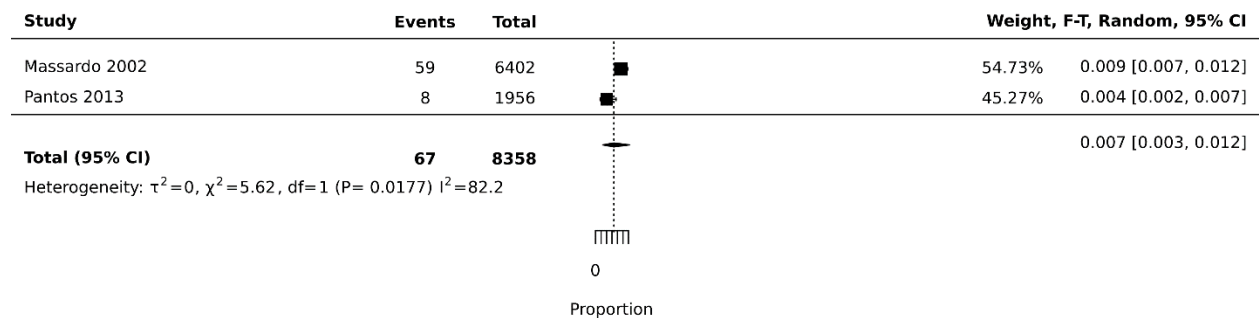

Figure S4b: Incidence of THA in RA population where OA diagnosis was not specifically excluded

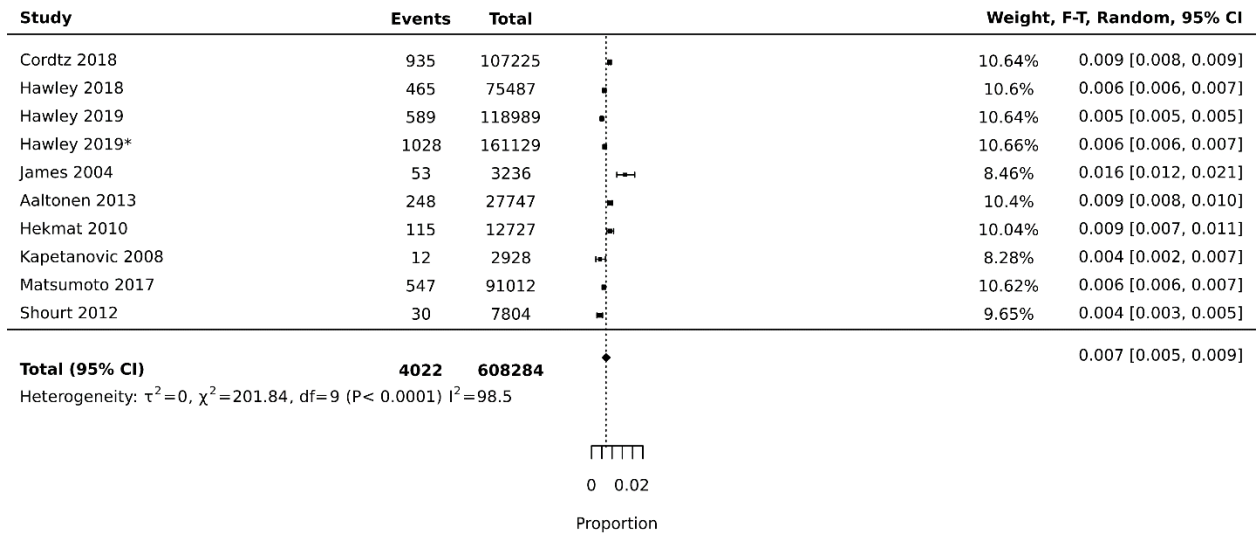

One outlier study was excluded (1)



Supplementary figures related to post-operative complications for RA patients receiving THA

Overall Complication rate

Figure S5a: Combined rate of post-operative periprosthetic fracture, revision, dislocation, infection, aseptic loosening for RA patients receiving THA from 1980-2019

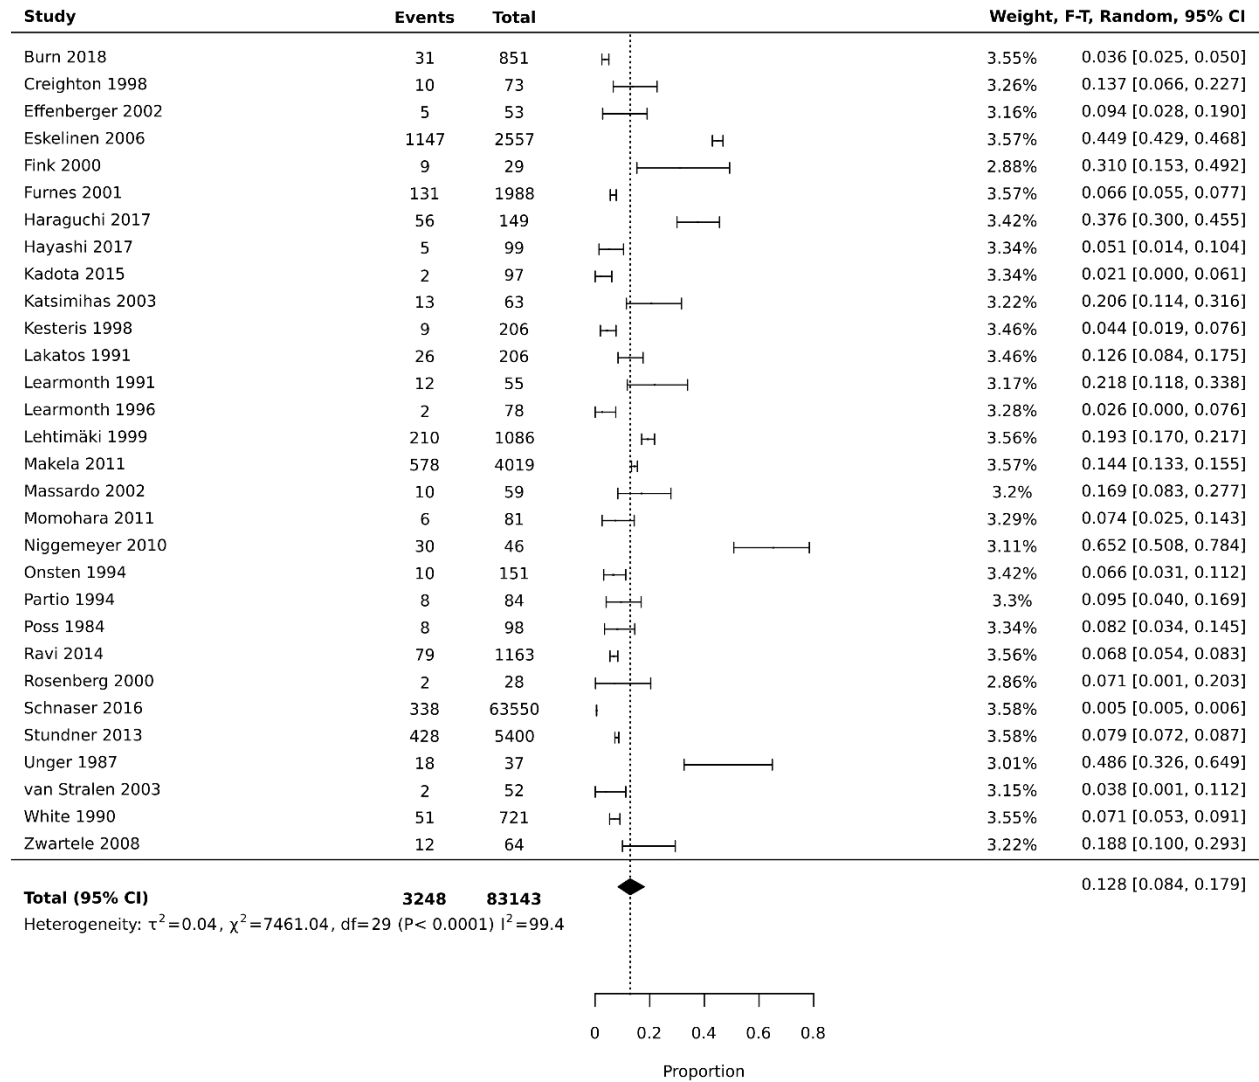

Figure S5b: Combined rate of post-operative periprosthetic fracture, revision, dislocation, infection, aseptic loosening for RA patients receiving THA from 1980-1989

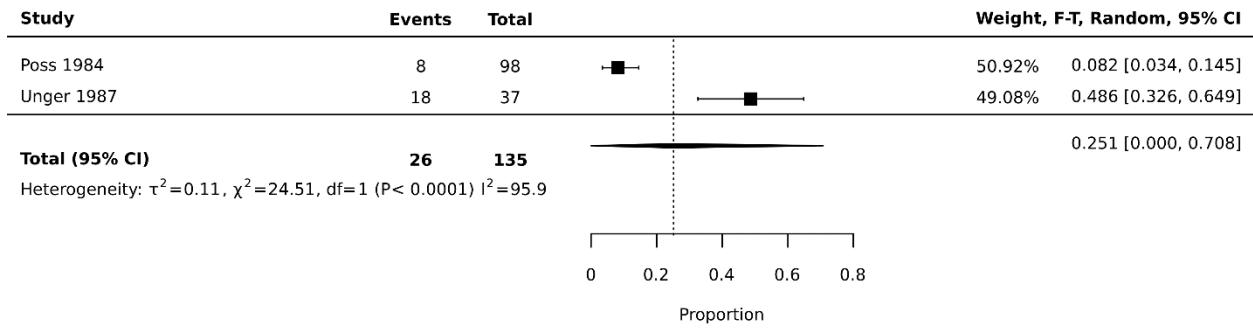

Figure S5c: Combined rate of post-operative periprosthetic fracture, revision, dislocation, infection, aseptic loosening for RA patients receiving THA from 1990-1999

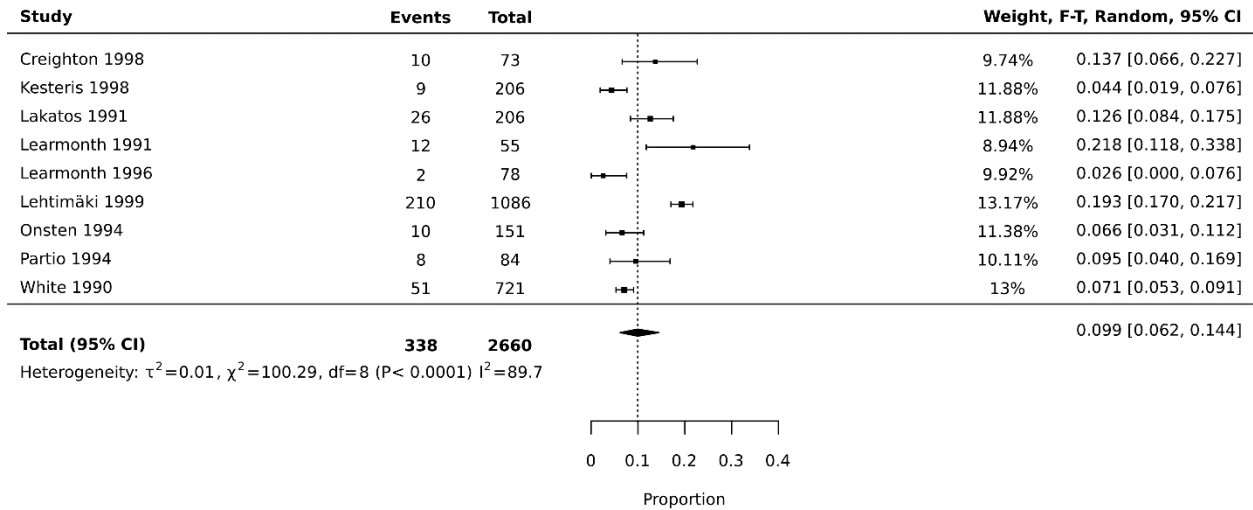

Figure S5d: Combined rate of post-operative periprosthetic fracture, revision, dislocation, infection, aseptic loosening for RA patients receiving THA from 2000-2009

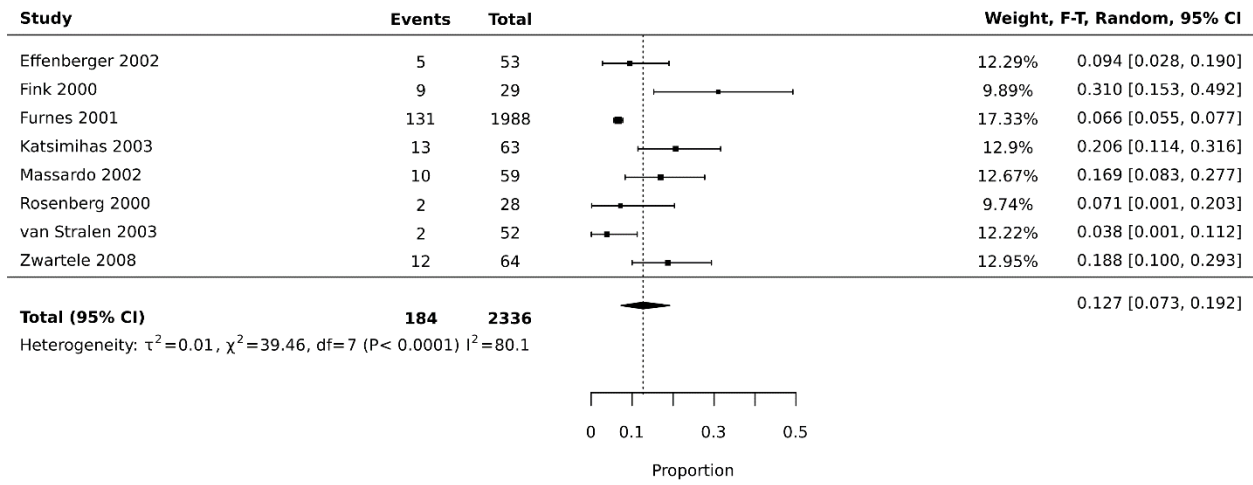

One outlier study removed (2)

Figure S5e: Combined rate of post-operative periprosthetic fracture, revision, dislocation, infection, aseptic loosening for RA patients receiving THA from 2010-2019

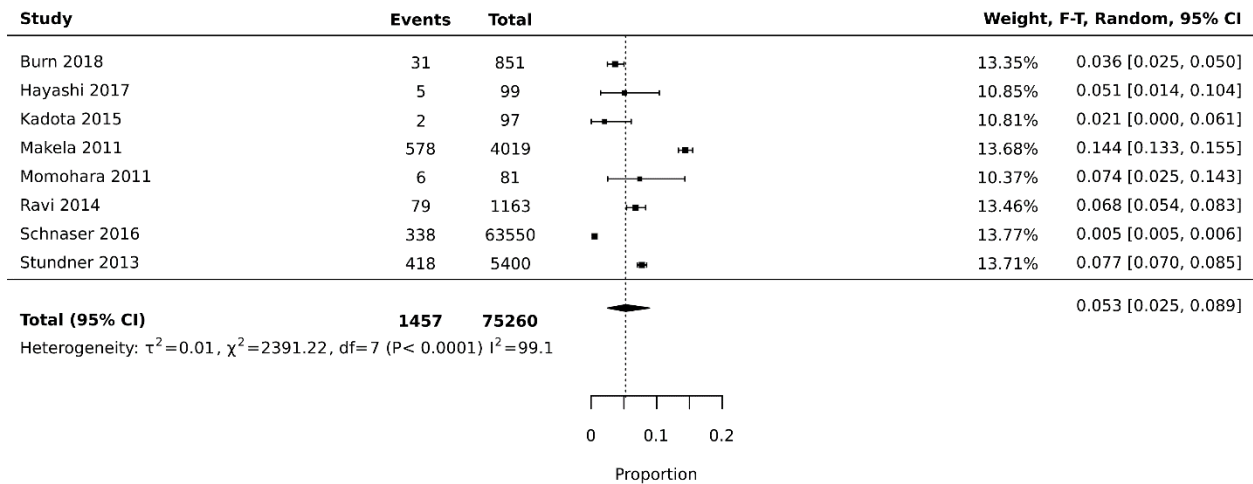

2 outlier studies removed (3, 4)

Figure S5f: Combined rate of post-operative periprosthetic fracture, revision, dislocation, infection, aseptic loosening for RA patients receiving THA in North America

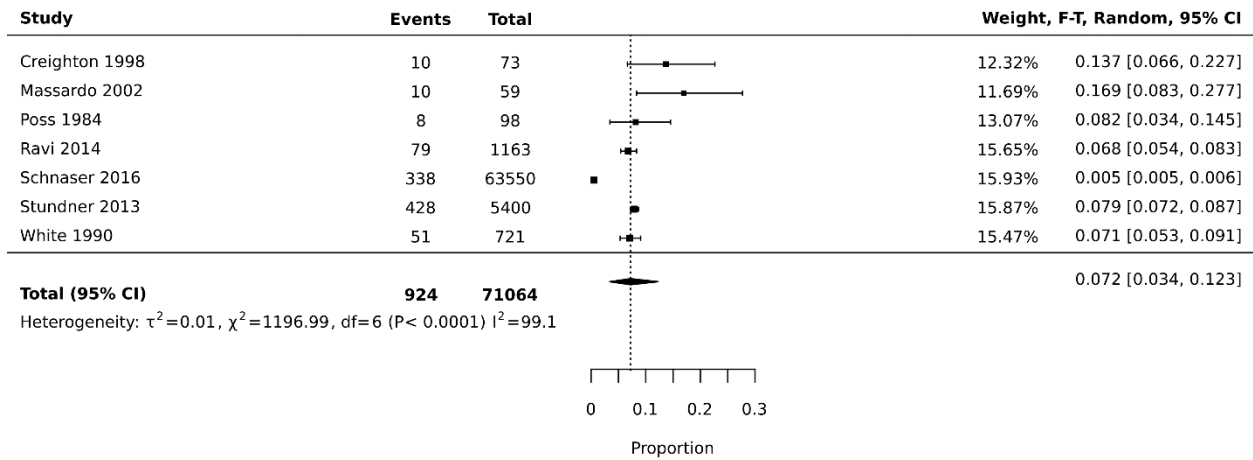

One outlier study removed (5)

Figure S5g: Combined rate of post-operative periprosthetic fracture, revision, dislocation, infection, aseptic loosening for RA patients receiving THA in Europe

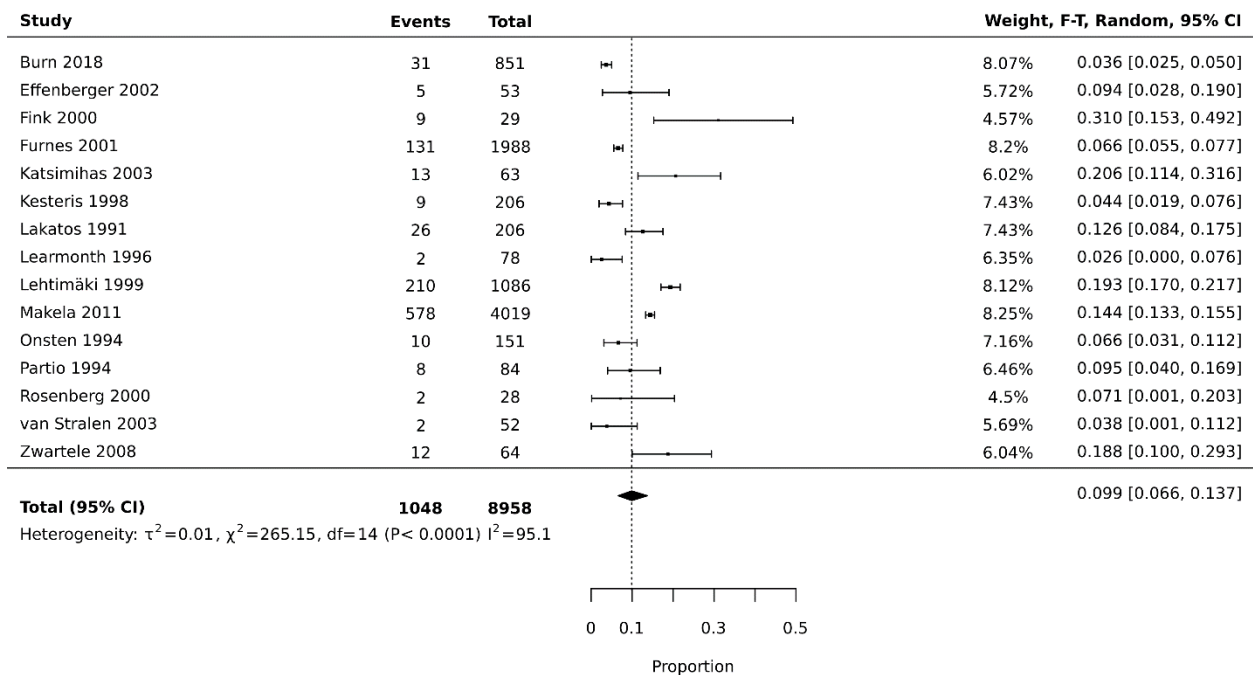

Two outlier studies removed (2, 4)

Figure S5h: Combined rate of post-operative periprosthetic fracture, revision, dislocation, infection, aseptic loosening for RA patients receiving THA in Asia

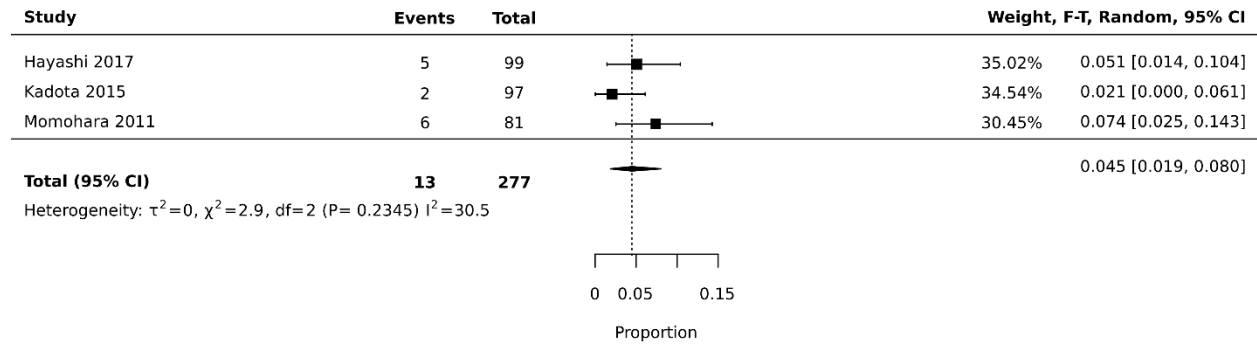

One outlier study removed (3)

Revision rate

Figure S6a: Rate revision for RA patients receiving THA from 1980-2019

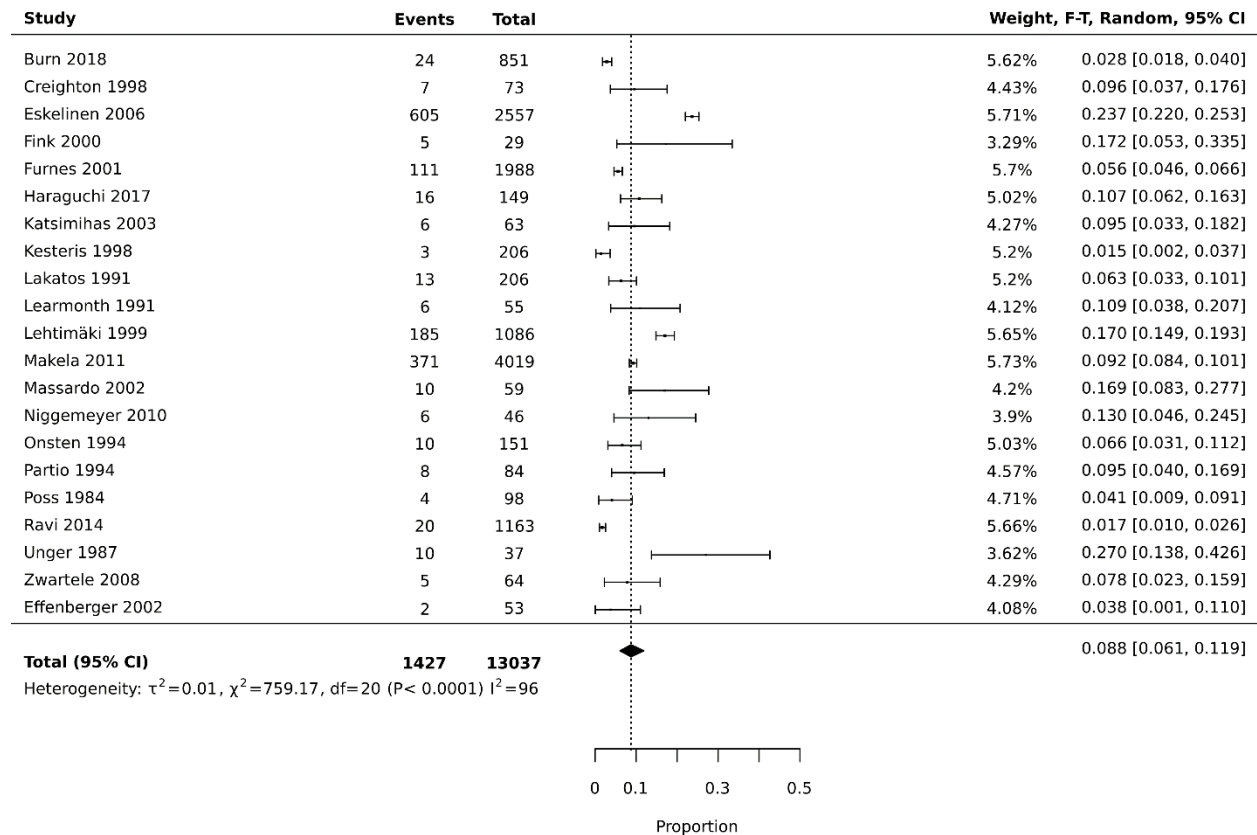

Figure S6b: Rate revision for RA patients receiving THA from 1980-1989

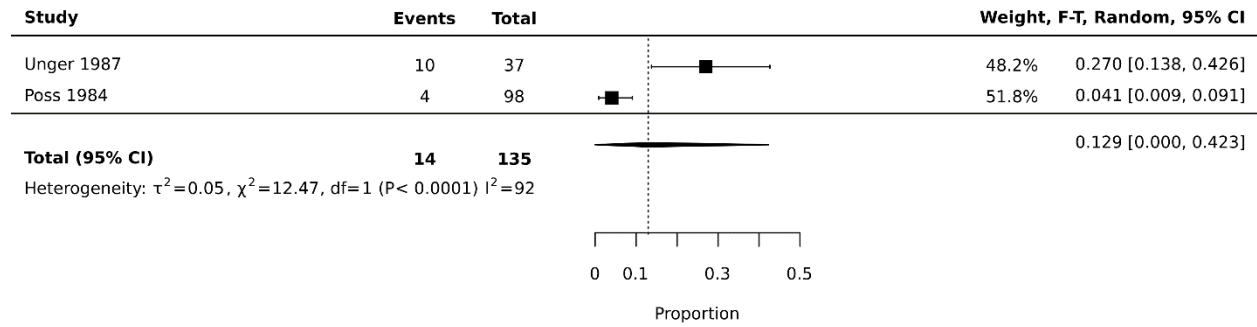

Figure S6c: Rate revision for RA patients receiving THA from 1990-1999

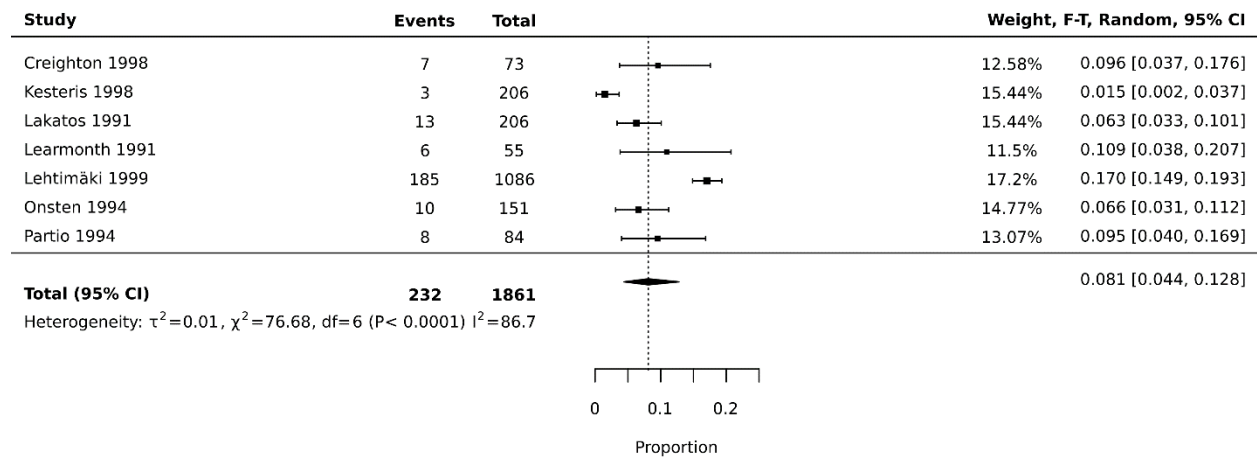

Figure S6d: Rate revision for RA patients receiving THA from 2000-2009

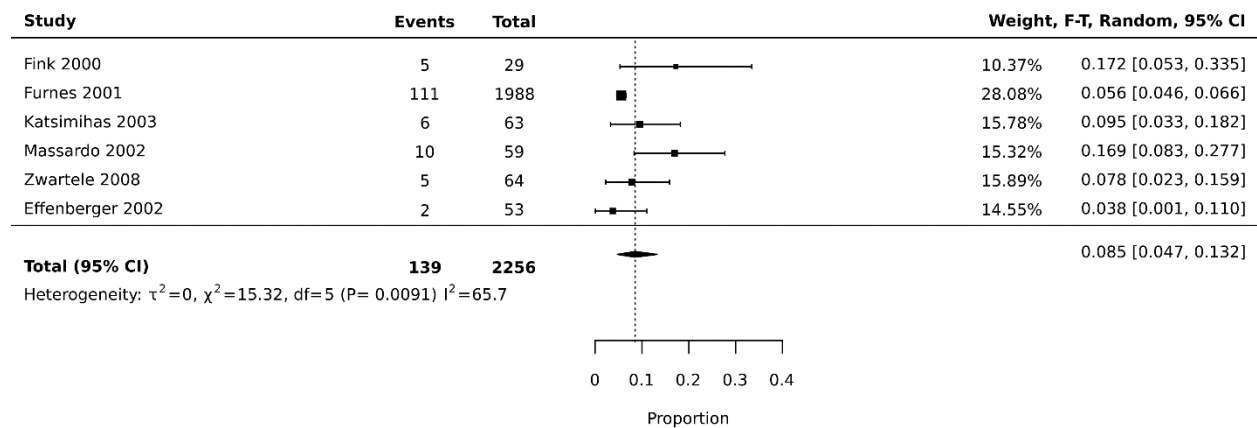

One outlier study was excluded (2)

Figure S6e: Rate revision for RA patients receiving THA from 2010-2019

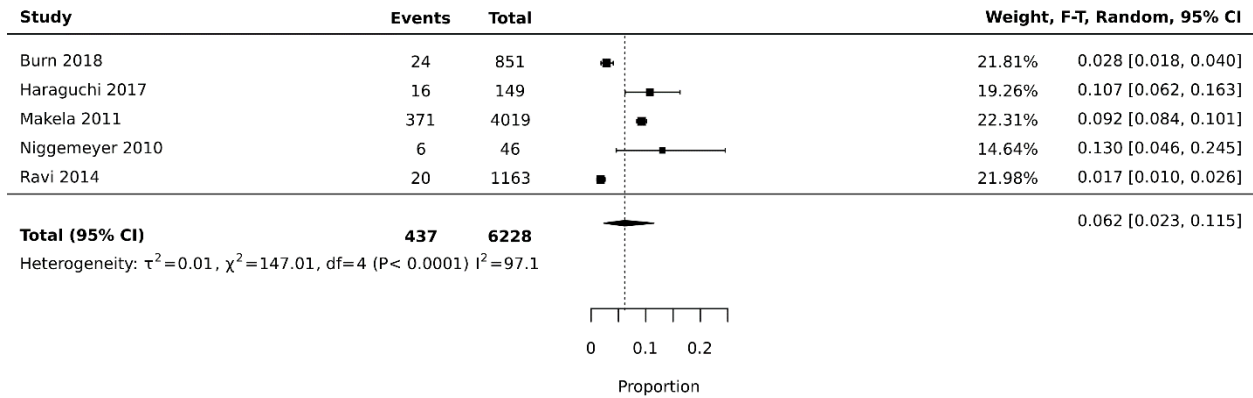

## Periprosthetic Fracture

Figure S7a: Post-operative periprosthetic fracture rate in RA patients receiving THA from 1990-2019

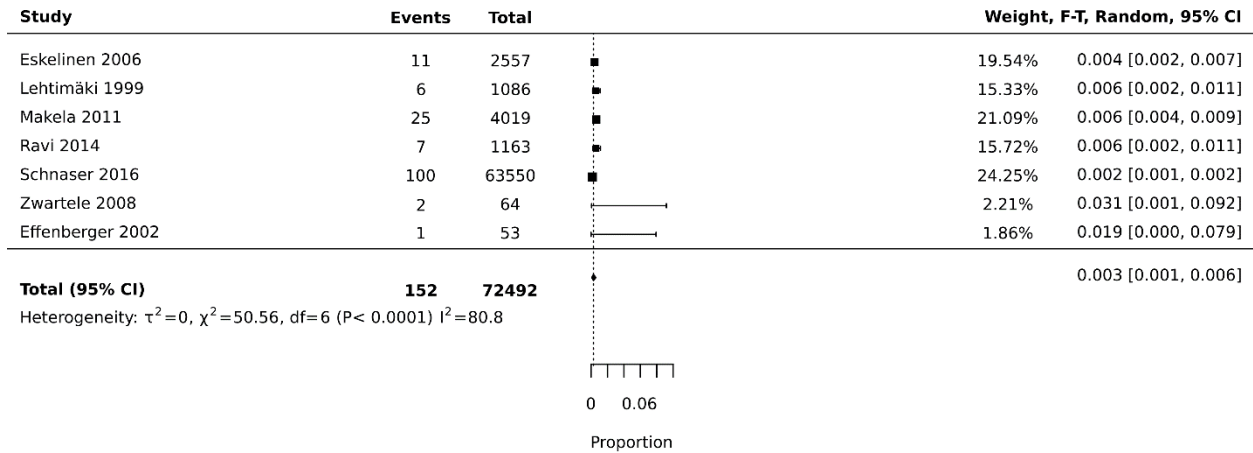

One outlier study was removed (3)

Figure S7b: Post-operative periprosthetic fracture rate in RA patients receiving THA from 2000-2009

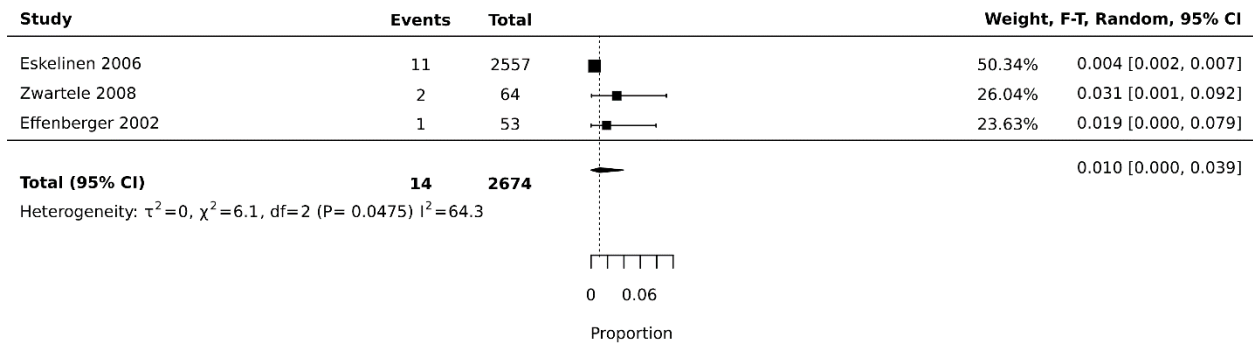

Figure S7c: Post-operative periprosthetic fracture rate in RA patients receiving THA from 2010-2019

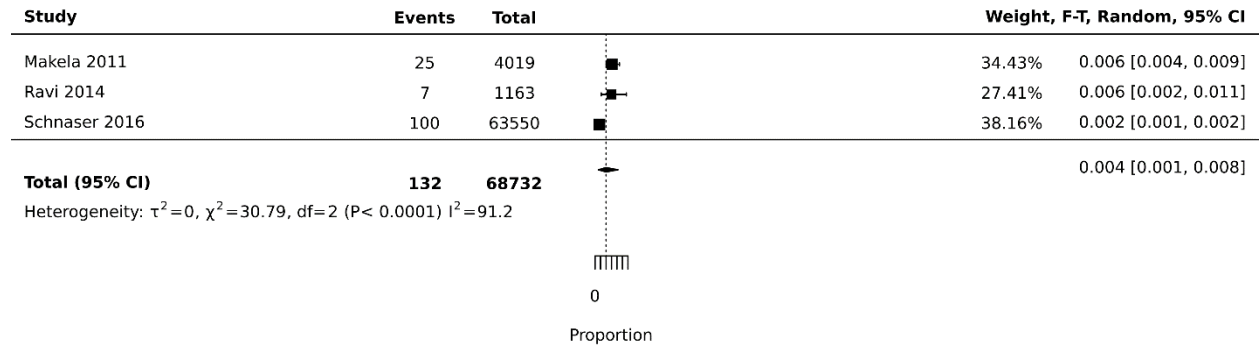

## Infection

Figure S8a: Post-operative infection rate for RA patients receiving THA from 1980-2019

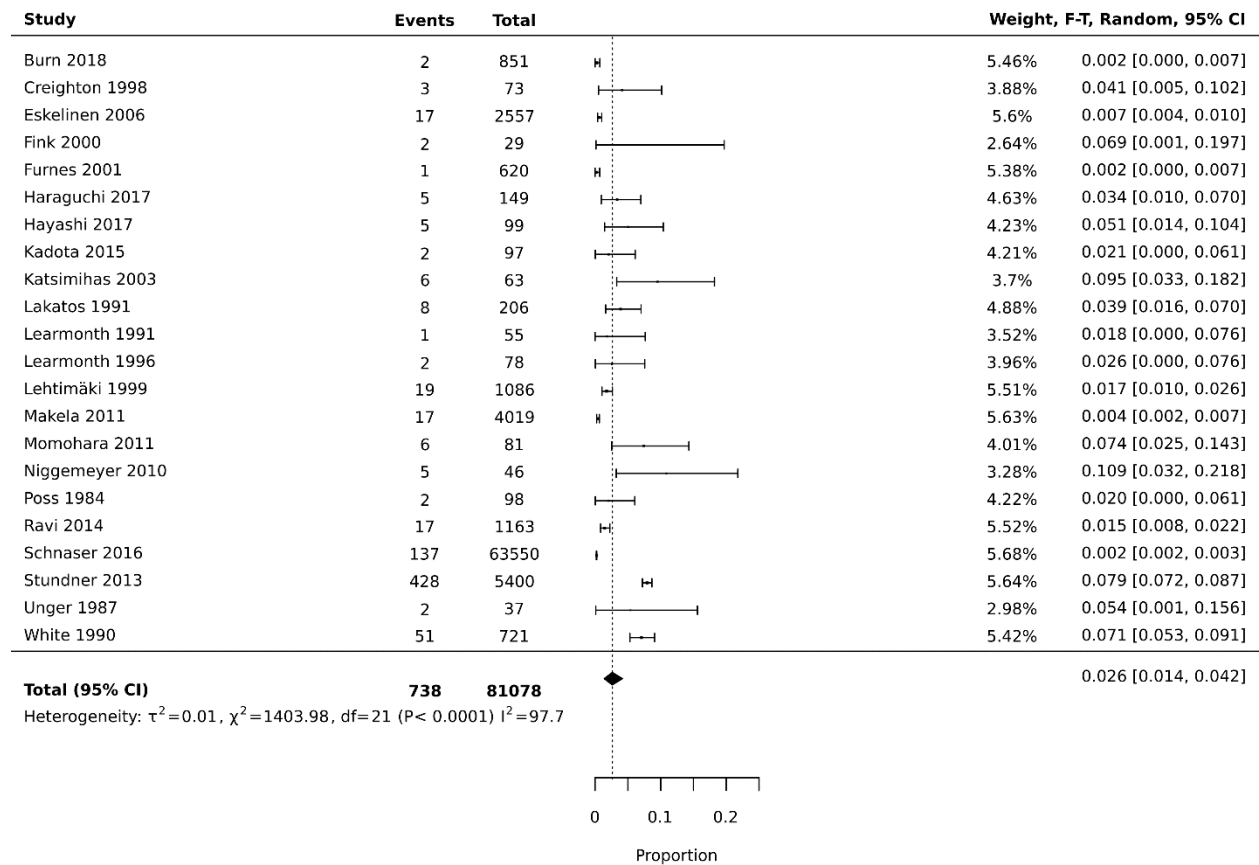



Figure S8b: Post-operative infection rate for RA patients receiving THA from 1990-1999

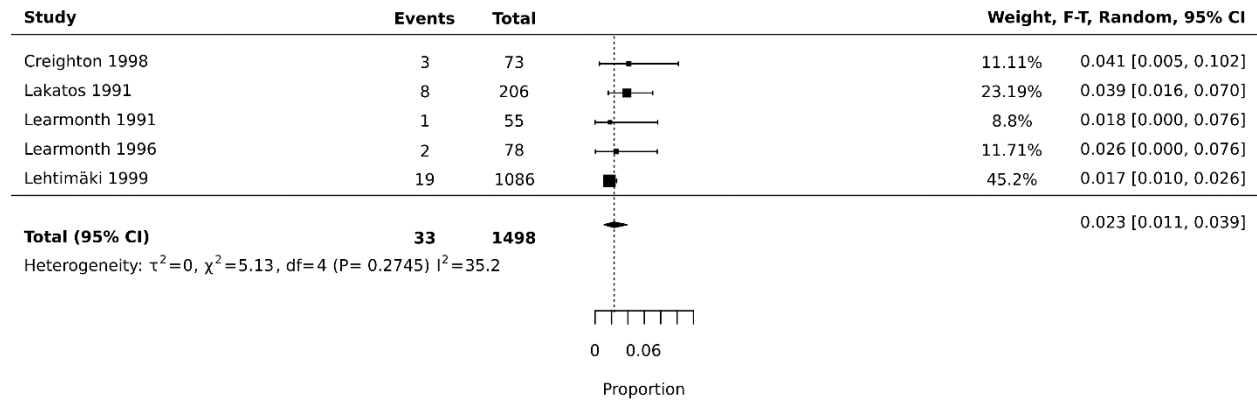

Removal of one outlier study (6)

Figure S8c: Post-operative infection rate for RA patients receiving THA from 2000-2009

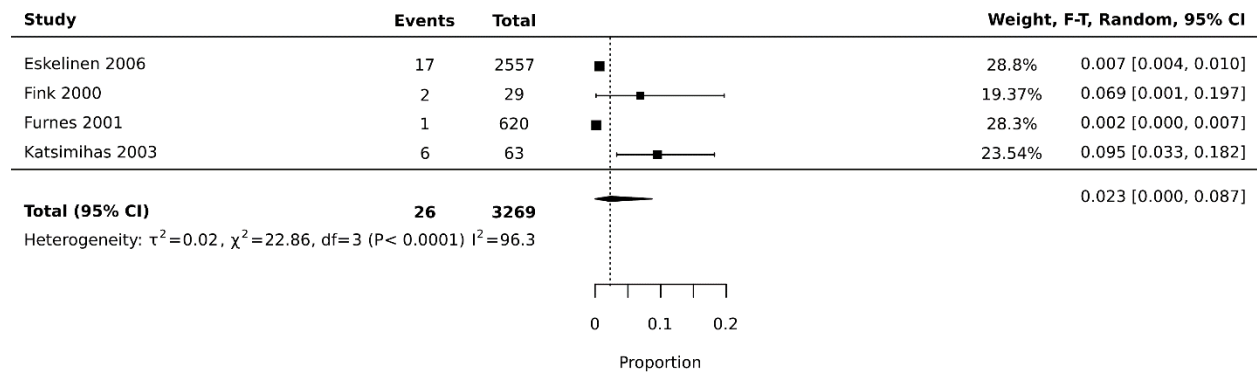

Figure S8d: Post-operative infection rate for RA patients receiving THA from 2010-2019

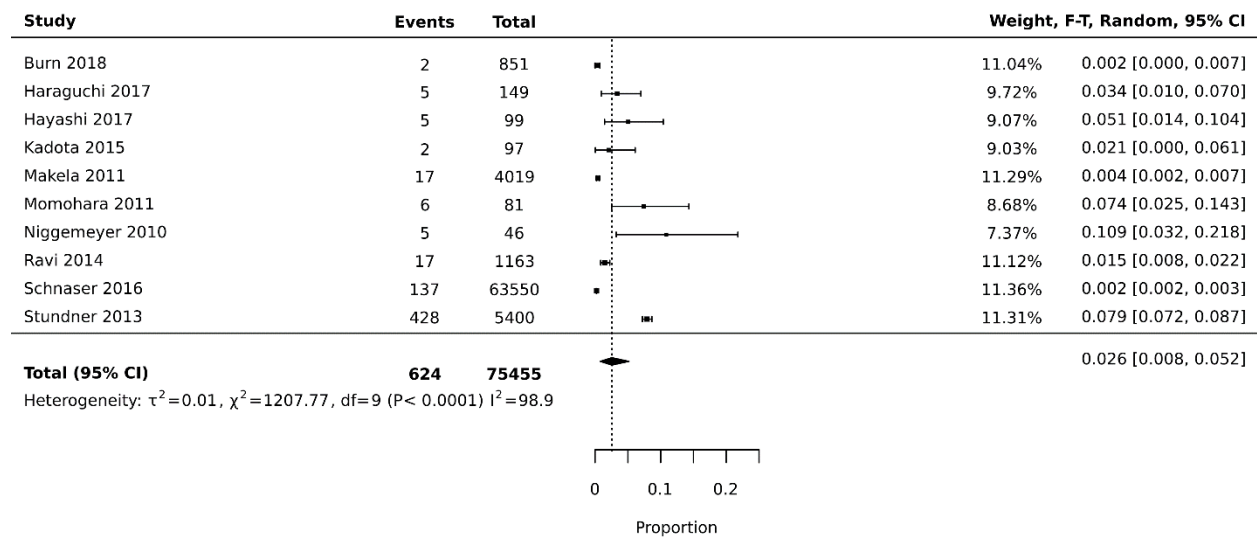

## Aseptic Loosening

Figure S9a: Post-operative aseptic loosening rate for RA patients receiving THA from 1980-2019

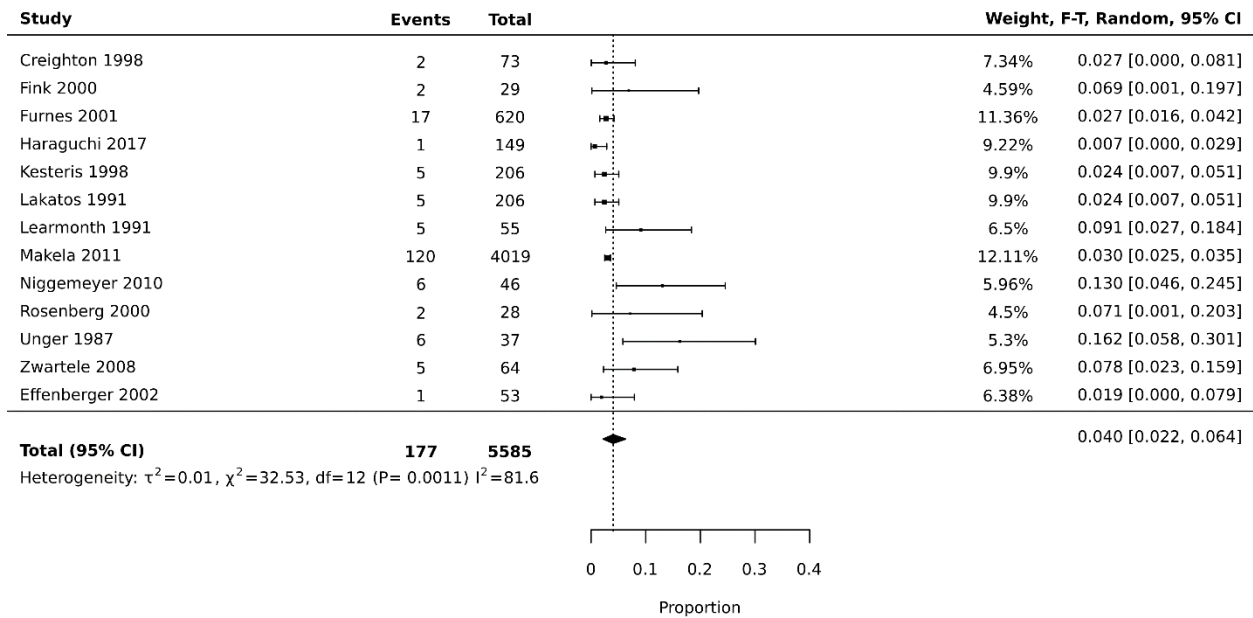

Figure S9b: Post-operative aseptic loosening rate for RA patients receiving THA from 1990-1999

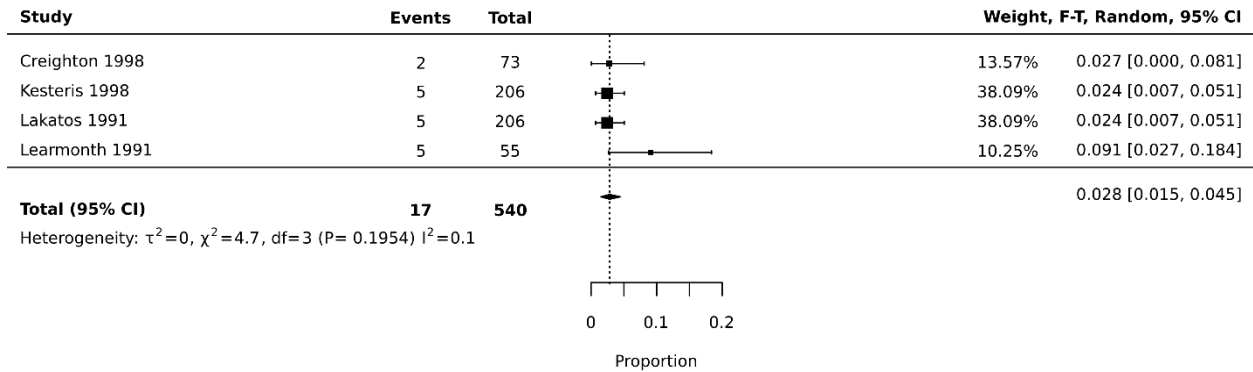

Figure S9c: Post-operative aseptic loosening rate for RA patients receiving THA from 2000-2009

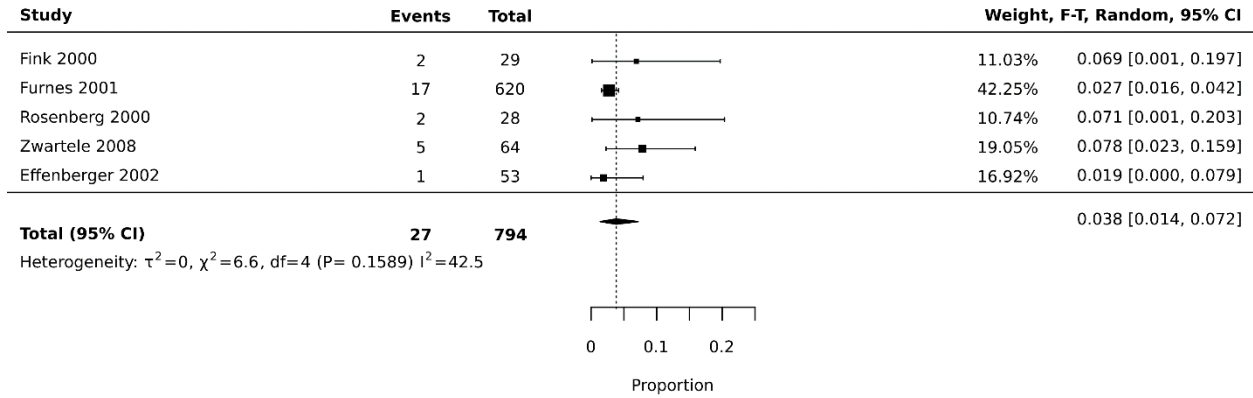

Figure S9d: Post-operative aseptic loosening rate for RA patients receiving THA from 2010-2019

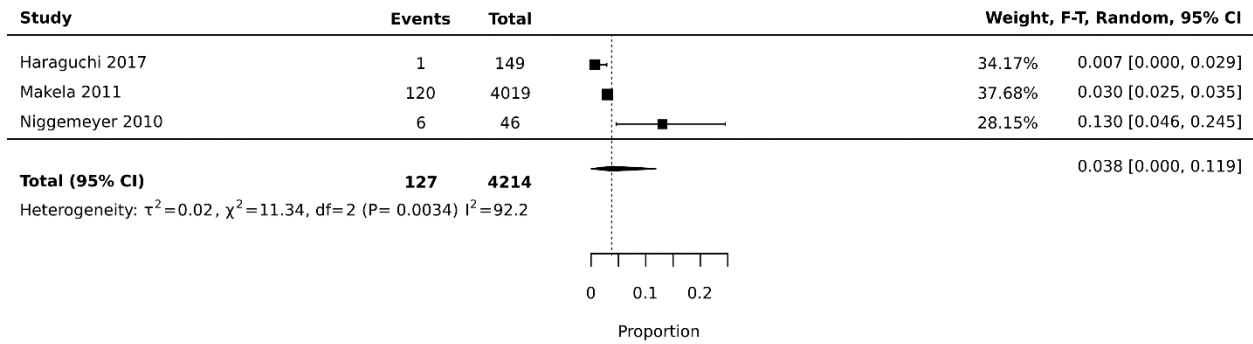

## Dislocation

Figure S10a: Post-operative dislocation rate in RA patient receiving THA from 1990-2019

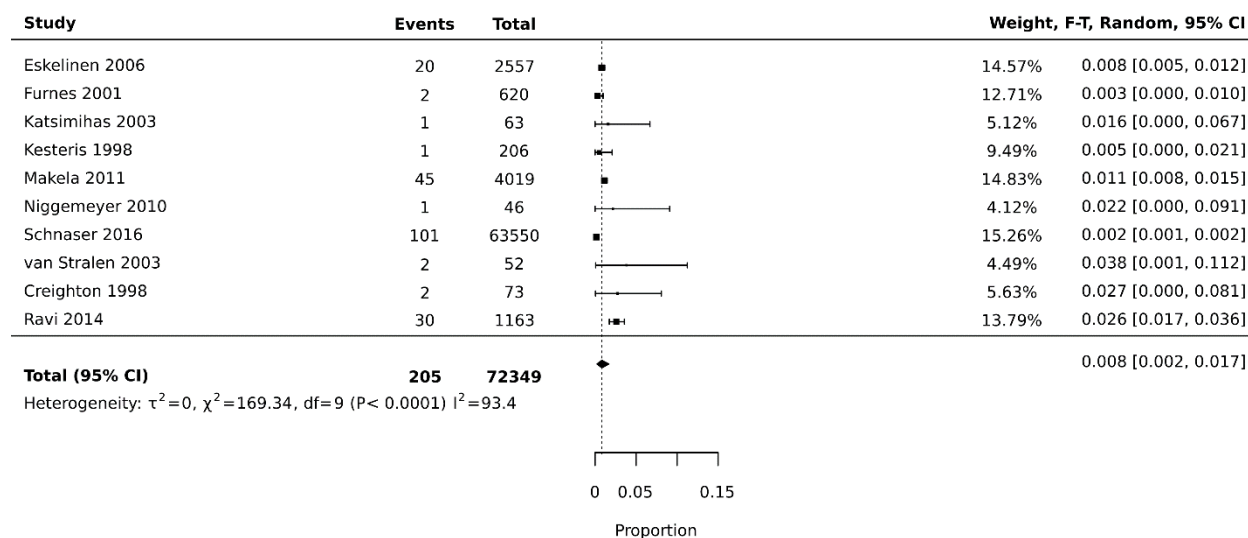

Figure S10b: Post-operative dislocation rate in RA patient receiving THA from 1990-1999

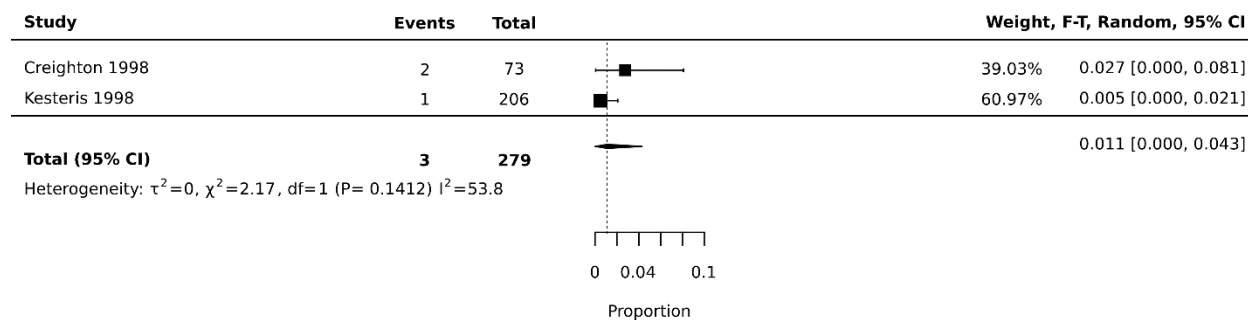

Figure S10c: Post-operative dislocation rate in RA patient receiving THA from 2000-2009

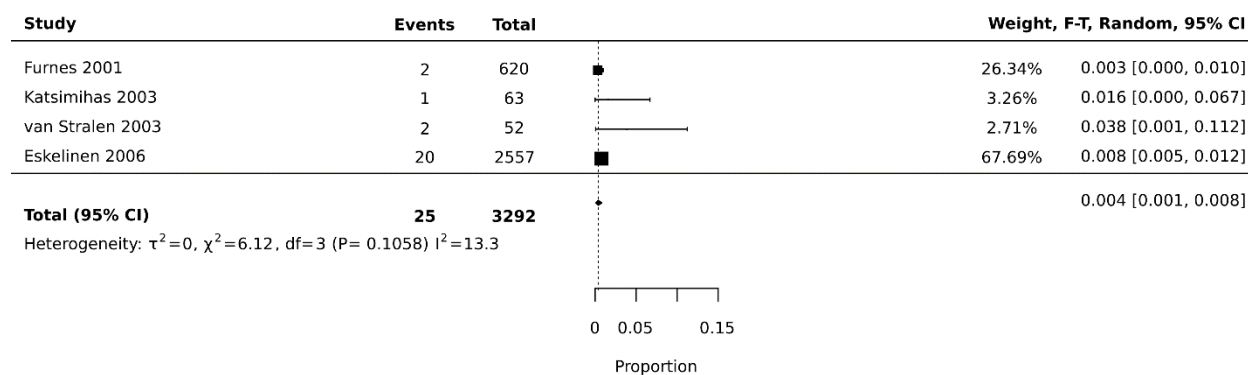

Figure S10d: Post-operative dislocation rate in RA patient receiving THA from 2010-2019

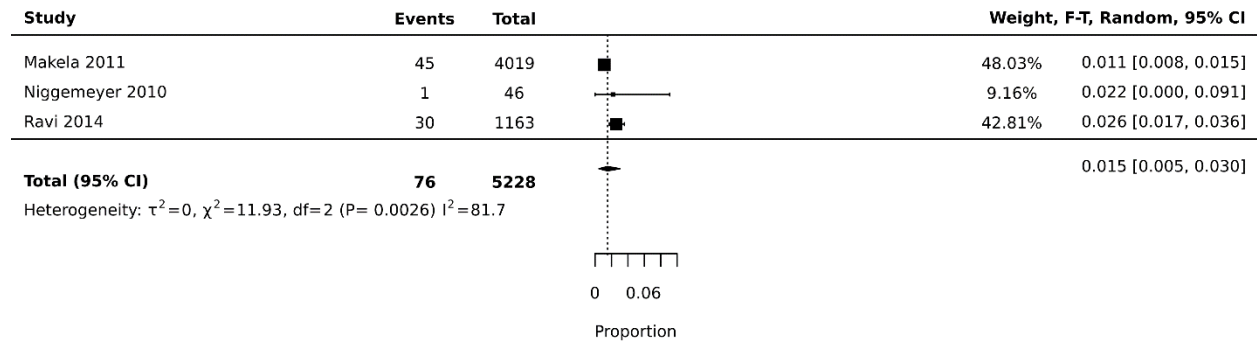

One outlier study was removed (7)

VTE

Figure S11a: Rate of post-operative VTE in RA patients receiving THA 1980-2019

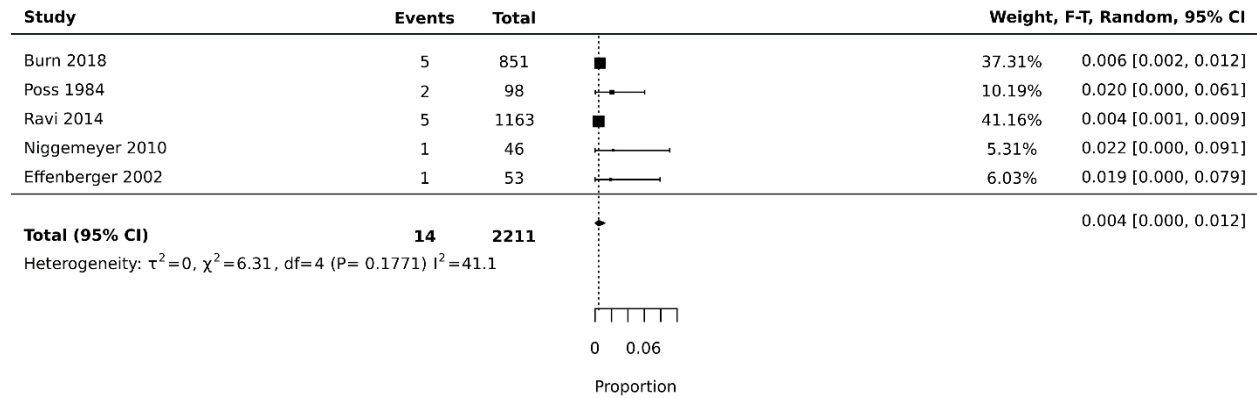

Figure S11b: Rate of post-operative VTE in RA patients receiving THA 2010-2019

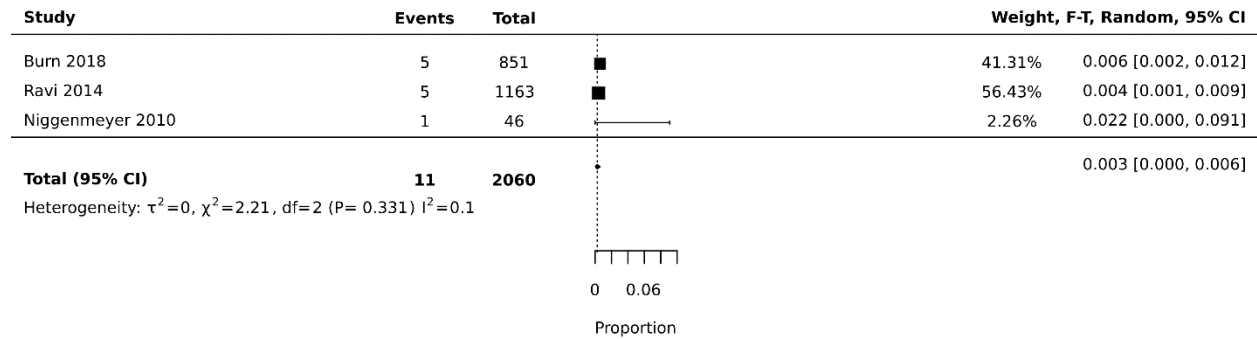

## Mortality

Figure S12a: Post-operative 90-day mortality rate for RA patients receiving THA between 1980 and 2019

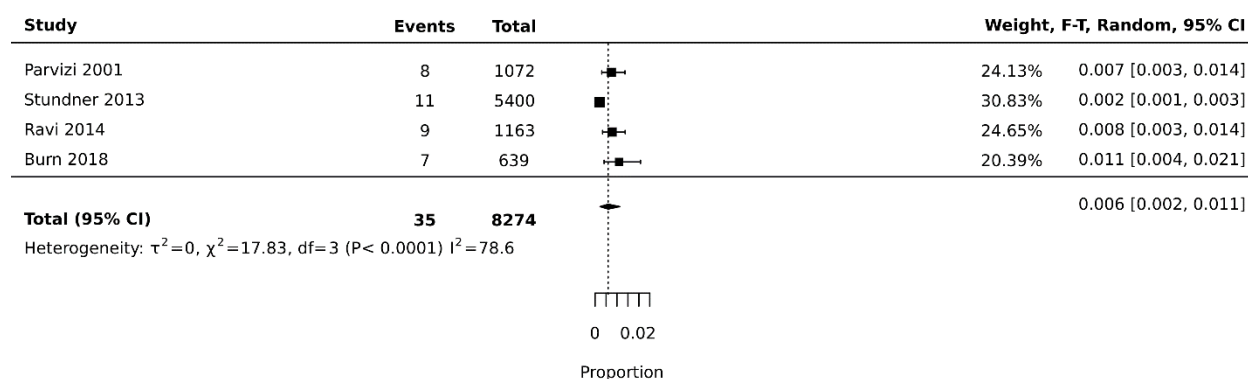

Figure S12b: Mortality rate for studies from 2010-2019 with mean follow up time less than 90 days

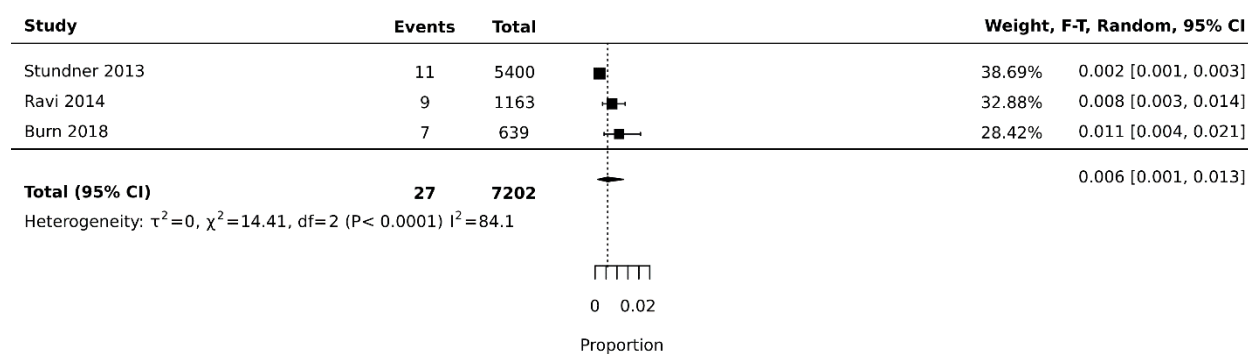

1. Eberhardt K, Fex E, Johnsson K, Geborek P. Hip involvement in early rheumatoid arthritis. *Annals of the rheumatic diseases*. 1995;54(1):45-8.
2. Eskelinen A, Paavolainen P, Helenius I, Pulkkinen P, Remes V. Total hip arthroplasty for rheumatoid arthritis in younger patients: 2,557 replacements in the Finnish Arthroplasty Register followed for 0-24 years. *Acta orthopaedica*. 2006;77(6):853-65.
3. Haraguchi A, Nakashima Y, Miyahara H, Esaki Y, Okazaki K, Fukushi J-I, et al. Minimum 10-year results of cementless total hip arthroplasty in patients with rheumatoid arthritis. *Modern rheumatology*. 2017;27(4):598-604.
4. Niggemeyer O, Steinhagen J, Ruether W. Long-term results of the thrust plate prosthesis in patients with rheumatoid arthritis: a minimum 10-year follow-up. *Journal of orthopaedic science : official journal of the Japanese Orthopaedic Association*. 2010;15(6):772-80.
5. Unger AS, Ranawat CS, Johanson NA. Total hip arthroplasty in rheumatoid arthritis: A long-term follow-up study. *Journal of Arthroplasty*. 1987;2(3):191-7.
6. White RH, McCurdy SA, Marder RA. Early morbidity after total hip replacement: rheumatoid arthritis versus osteoarthritis. *Journal of general internal medicine*. 1990;5(4):304-9.
7. Schnaser EA, Browne JA, Padgett DE, Figgie MP, D'Apuzzo MR. Perioperative Complications in Patients With Inflammatory Arthropathy Undergoing Total Hip Arthroplasty. *The Journal of arthroplasty*. 2016;31(10):2286-90.
